# Supplementary material for: How can socioeconomic inequalities in hospital admissions be explained? A cohort study
Source: HighWire-hosted journal article supplement (doi:10.1136/bmjopen-2012-002433), 2013-08-01
Supplement: bmjopen-2012-002433supp_table.pdf [file bmjopen-2012-002433supp_table.pdf]

**Webtable 1 - International Classification of Diseases (ICD) codes for causes of admissions**

|                                      | <b>ICD8</b> | <b>ICD9</b>                                           | <b>ICD10</b>                            |
|--------------------------------------|-------------|-------------------------------------------------------|-----------------------------------------|
| <b>Cardiovascular disease</b>        | 390 – 458   | 390 - 459                                             | I00 - I99, G45, M300, M303, R58X        |
| <b>Coronary heart disease</b>        | 410 - 414   | 410 - 414                                             | I20 - I25                               |
| <b>Stroke</b>                        | 430 - 438   | 430 - 438                                             | I60 - I69, G45                          |
| <b>Respiratory diseases</b>          | 460 - 519   | 460 - 519                                             | J00 - J99                               |
| <b>Digestive diseases</b>            | 520 - 577   | 520 - 579                                             | K00 - K93                               |
| <b>Cancer</b>                        | 140 - 209   | 140 - 208                                             | C00 - C97                               |
| <b>Depression/anxiety</b>            | 300         | 300, 308-9, 311                                       | F32 -34 (except F32.3, F33.3), F40 - 43 |
| <b>Psychoses</b>                     | 298.2       | 295, 296.0 - 296.5, 297, 298.0 - 298.4, 298.8 - 298.9 | F20, F21 - 29, F31, F32.3, F33.3        |
| <b>Drug &amp; alcohol dependence</b> | 291, 303-4  | 291, 292.1, 303-4                                     | F10 - F19                               |
| <b>Alzheimer's &amp; dementia</b>    | 290         | 290, 294.1, 331.0                                     | F00 - F03, G30                          |
